# Supplementary material for: Coral reef degradation at an atoll of the Western Colombian Caribbean
Source: PeerJ. 2023 Apr 12;11:e15057. doi: 10.7717/peerj.15057 (PMC10105559; doi:10.7717/peerj.15057)
Supplement: Supplemental Information 3 — Samples as rows and factors and benthic categories as columns. Data is in percentages. [file peerj-11-15057-s003.xlsx]

## Sheet: Hoja1
FECHA	STATION	GROUP	LON	LAT	DEPTH	C	OCTO	SPG	ZOAN	MALG	CYAN	CALG	EALG
2021-11-06	1	G	14° 11' 22,708" N	81° 13' 15,413" W	9.5	14.5	10	10	0	10	0	0	0
2021-11-06	2	K	14° 11' 41,096" N	81° 13' 24,888" W	1.6	15.6	5	2	0	21.4	1	10	30
2021-11-06	3	D	14° 11' 56,015" N	81° 12' 43,178" W	2	10	0.2	0	0	40	0	0	10
2021-11-06	4	B	14° 14' 52,890" N	81° 12' 11,074" W	4	13.5	1	0	0	50	0	0	0
2021-11-06	5	G	14° 23' 6,637" N	81° 9' 56,124" W	3	27.2	5	0	0	27.8	0	10	20
2021-11-06	6	G	14° 15' 43,956" N	81° 11' 44,347" W	3	23	6	0	0	30	0	9	22
2021-11-06	7	G	14° 15' 54,976" N	81° 11' 25,937" W	4.8	27	5	0	0	26	0	7	18
2021-11-06	8	D	14° 23' 13,614" N	81° 9' 35,736" W	3	17	6	0	0	37	0	0	10
2021-11-06	9	A	14° 22' 18,110" N	81° 7' 29,203" W	7.7	15	2	2	0	20	0	0	0
2021-11-06	10	B	14° 23' 20,011" N	81° 9' 45,983" W	6.7	9.6	4	3	0	53.4	0	0	10
2021-11-06	11	A	14° 12' 19,314" N	81° 13' 9,768" W	8	8	5	2	0	15	0	0	0
2021-11-06	12	G	14° 10' 52,039" N	81° 12' 42,836" W	7.5	17.6	4	2	0	15.4	0	10	4
2021-11-06	13	A	14° 10' 50,412" N	81° 13' 14,254" W	13.5	8	10	5	0	30	3	0	0
2021-11-07	14	D	14° 16' 49,602" N	81° 11' 13,207" W	7.7	16.6	5	6	0	30	0	0	10
2021-11-07	15	C	14° 16' 55,373" N	81° 11' 1,090" W	6.5	5.7	0.5	7	0	20	0	0	0
2021-11-07	16	F	14° 13' 39,155" N	81° 11' 28,856" W	18	10.8	0	15	0	25	3	16.9	0
2021-11-07	17	G	14° 14' 10,313" N	81° 11' 37,720" W	18	28.2	4	20	0	15.8	3	10	4
2021-11-07	18	D	14° 14' 47,648" N	81° 11' 33,742" W	2.6	14.1	3	0.5	0	40	0	0	20
2021-11-07	19	E	14° 22' 57,011" N	81° 10' 19,315" W	6.7	28.6	0	1	0	30	0	0	0
2021-11-07	20	F	14° 10' 52,342" N	81° 12' 8,384" W	13	2.1	0	2	0	40	1	20	5
2021-11-07	21	B	14° 10' 51,539" N	81° 12' 41,198" W	5.5	2.2	0	4.8	0	70	0	0	3
2021-11-07	22	B	14° 12' 17,204" N	81° 11' 46,172" W	4.9	2.9	0.5	2	0	50.6	0	0	0
2021-11-07	23	G	14° 14' 5,996" N	81° 12' 14,360" W	11	32.31	6	20	0	23.69	8	10	0
2021-11-07	24	A	14° 14' 6,659" N	81° 12' 11,887" W	5.6	10.1	5	1	0	15	0	0	0
2021-11-07	25	G	14° 15' 28,858" N	81° 11' 50,140" W	11.7	11.4	3	2	0	13.5	0	5	0
2021-11-08	26	B	14° 24' 32,515" N	81° 8' 57,228" W	9	8.1	3	4	0	40	0	0	0
2021-11-08	27	D	14° 24' 26,460" N	81° 8' 41,878" W	3	6.3	8.7	0	0	50	0	0	15
2021-11-08	28	B	14° 22' 18,936" N	81° 7' 30,361" W	8.6	13.2	3	0	0	50	0	0	1
2021-11-08	29	B	14° 24' 27,605" N	81° 8' 8,833" W	8.1	0.8	0	10	0	80	0	0	0
2021-11-08	30	D	14° 24' 43,409" N	81° 7' 51,931" W	3	9.8	0.2	0.5	0	39.5	0	0	20
2021-11-08	31	G	14° 24' 44,597" N	81° 8' 9,362" W	10.3	38.5	1	5	0	30	0	0	0
2021-11-08	32	C	14° 24' 58,482" N	81° 9' 17,006" W	23	7.6	20	20	0	40	0	0	0
2021-11-08	33	A	14° 24' 45,760" N	81° 9' 33,779" W	17	5.75	15	7.55	0	54.7	2	0	0
2021-11-08	34	J	14° 24' 46,663" N	81° 10' 12,680" W	2	44	0	1	0.5	20	0	0	20
2021-11-08	35	B	14° 24' 41,497" N	81° 10' 45,340" W	8	10.3	0	3	0	53.7	0	3	0
2021-11-09	36	A	14° 10' 20,129" N	81° 12' 6,980" W	18	26.75	3	3.5	0	45	3	0.7	1.5
2021-11-10	37	B	14° 22' 55,830" N	81° 9' 1,832" W	11.5	8.71	2	1	0	30	0	0	0
2021-11-10	38	B	14° 9' 32,735" N	81° 9' 58,586" W	10	1.3	2	0	0	56.7	0	0	0
2021-11-10	39	B	14° 9' 14,314" N	81° 12' 6,062" W	9.9	2.43	2	0.1	0	50	0	0	0
2021-11-10	40	B	14° 22' 47,852" N	81° 9' 44,953" W	11.3	5	5	1	0	60	0	0	0
2021-11-10	41	A	14° 23' 20,976" N	81° 9' 12,784" W	12.1	16.3	3.5	1.8	0	38.4	0	0	0
2021-11-10	42	B	14° 22' 46,708" N	81° 10' 18,217" W	10.7	5	2	1	0	50	0	0	0
2021-11-10	43	H	14° 24' 57,838" N	81° 9' 15,937" W	2	7.2	0.1	0	0	10	0	20	0
2021-11-10	44	K	14° 8' 7,82" N	81° 10' 0,329" W	1.5	7.1	0.5	12.4	0	20	0	0	30
2021-11-10	45	E	14° 19' 3,785" N	81° 8' 14,726" W	2.2	10.8	1.2	0	0.1	15	0	3.2	0
2021-11-10	46	D	14° 19' 4,609" N	81° 7' 58,494" W	1.8	16.52	0.5	1	1	30	0	0	15
2021-11-10	47	K	14° 19' 56,111" N	81° 7' 34,201" W	1.6	22.1	0.5	0	3	24.4	0	0	50
2021-11-10	48	J	14° 20' 7,764" N	81° 7' 38,755" W	1	48	0	5	20	10	0	0	15
2021-11-10	49	J	14° 9' 29,233" N	81° 9' 44,539" W	2.5	35.4	1	1.5	5	20	0	2	10
2021-11-10	50	J	14° 22' 56,032" N	81° 9' 4,550" W	7.2	42.9	0.5	0	0	1.6	0	0	5
2021-11-11	51	A	14° 26' 12,314" N	81° 9' 49,860" W	14	18.56	5	3	0	30	4	0	0.5
2021-11-06	52	D	14° 25' 31,174" N	81° 8' 13,103" W	3.5	13.5	3	0	0	15	0	0	6
2021-11-06	53	B	14° 26' 21,196" N	81° 7' 56,222" W	11	8.8	5	1	0	66.2	0	0	0
2021-11-06	54	D	14° 26' 36,823" N	81° 8' 12,894" W	1.6	15	0	0	0	47	0	0	5
2021-11-06	55	B	14° 28' 51,643" N	81° 7' 29,366" W	8.8	5.7	5	5	0	30	0	0	0
2021-11-06	56	J	14° 22' 58,760" N	81° 10' 6,715" W	5.6	51	6	0	0	0	0	0	0
2021-11-06	57	B	14° 28' 53,616" N	81° 7' 20,568" W	7.9	4.6	3	0.5	0	20	0	0	0
2021-11-06	58	B	14° 28' 15,481" N	81° 7' 9,523" W	9.3	13	7	0	0	35	0	0	0
2021-11-06	59	G	14° 27' 59,483" N	81° 8' 18,053" W	10.7	11.7	5	0	0	10	0	0	0
2021-11-06	60	A	14° 27' 36,817" N	81° 8' 9,067" W	12.6	24.3	7	1	0	35	0.5	0	0
2021-11-06	61	A	14° 16' 47,525" N	81° 12' 19,375" W	12.8	15.4	3	1	0	30	0	0	0
2021-11-07	62	B	14° 14' 39,246" N	81° 11' 42,410" W	18.5	5	6	7	0	75	0	0	0
2021-11-07	63	B	14° 12' 54,144" N	81° 12' 51,566" W	12.5	5.8	5	2	0	19.2	0	0	0
2021-11-07	64	I	14° 19' 30,094" N	81° 11' 51,323" W	6.9	12.1	71.9	4	0	12	0	0	0
2021-11-07	65	B	14° 19' 59,871" N	81° 11' 42,838" W	13.4	5.3	0	0	0	69.7	0	0	0
2021-11-07	66	J	14° 20' 23,976" N	81° 11' 2,394" W	6.5	12	8	0	0	0	0	0	0
2021-11-07	67	A	14° 21' 8,500" N	81° 10' 47,936" W	3.1	14	2	1	0	15	0	0	0
2021-11-07	68	B	14° 20' 16,628" N	81° 10' 52,558" W	2	0	0	0	0	60	0	0	0
2021-11-07	69	B	14° 21' 15,900" N	81° 10' 1,821" W	2.8	0	0	0	0	35	0	0	0
2021-11-07	70	E	14° 21' 12,969" N	81° 9' 41,520" W	3.8	19.5	0	0	0	20	0	0	3
2021-11-07	71	B	14° 24' 23,720" N	81° 10' 25,831" W	2.9	0.2	0	0	0	25	0	0	0
2021-11-07	72	B	14° 21' 13,127" N	81° 8' 48,322" W	2.4	10.3	0.5	1	0	30	0	0	0
2021-11-07	73	B	14° 22' 37,024" N	81° 7' 6,547" W	4	8.5	10	0.5	0	60	0	0	0
2021-11-07	74	B	14° 16' 12,508" N	81° 9' 54,893" W	14.7	10.6	10	5	0	60	0	0	0
2021-11-07	75	B	14° 16' 11,132" N	81° 9' 53,953" W	11.9	8.6	2	1	0.5	35	0	0	3
2021-11-07	76	A	14° 24' 26,003" N	81° 9' 45,515" W	18.6	3.1	10	5	0	55	10	0	1
2021-11-07	77	B	14° 24' 35,244" N	81° 9' 13,392" W	14.2	6.4	1	1.5	0	30	0	0	1
2021-11-08	78	B	14° 18' 33,340" N	81° 7' 24,517" W	8.7	10	2	1	0	50	0	0	0
2021-11-08	79	B	14° 19' 40,127" N	81° 6' 57,604" W	7.3	7.5	0	0	0	30	0	0	0
2021-11-08	80	B	14° 17' 19,716" N	81° 12' 20,243" W	12.3	7.5	0	0	0	30	0	0	0
2021-11-08	81	A	14° 17' 19,716" N	81° 12' 20,243" W	5.6	13.5	1	1	0	20	0	0	0
2021-11-08	82	B	14° 11' 43,116" N	81° 12' 50,224" W	5.5	9.3	0	0	0	60.7	0	0	0
2021-11-09	83	E	14° 8' 45,352" N	81° 10' 57,925" W	6.8	9.5	0	1.5	0.5	10	0	0	0
2021-11-09	84	B	14° 8' 46,129" N	81° 10' 24,845" W	8.9	2.1	0.2	0.2	0	20	0	0	0
2021-11-09	85	A	14° 8' 1,234" N	81° 10' 12,947" W	8.1	9	0	2	0	19	0	0	0
2021-11-09	86	A	14° 8' 10,759" N	81° 9' 50,029" W	11	11.8	1	1	0	20	1	0	0
2021-11-09	87	A	14° 8' 21,854" N	81° 9' 38,909" W	11.7	11.8	0	0.5	0	20	0	0	0
2021-11-09	88	A	14° 8' 48,829" N	81° 9' 19,397" W	13.5	20.1	1	4	0	40	4	0	0
2021-11-09	89	A	14° 9' 22,766" N	81° 9' 28,717" W	17.7	8.8	1	4	0	20	0	0	0
2021-11-09	90	A	14° 23' 4,574" N	81° 9' 1,580" W	17.1	11.1	1.5	2	0	25	1.5	0	0
2021-11-10	91	B	14° 9' 45,457" N	81° 13' 12,216" W	10.4	6.2	0.5	0.1	0	31	0	0	0
2021-11-10	92	B	14° 24' 49,324" N	81° 8' 52,706" W	17.5	6.1	8	1	0	30	0	0	0
2021-11-10	93	A	14° 25' 15,010" N	81° 8' 22,409" W	19.5	23.8	6	4	0	35	4	0	0
2021-11-10	94	B	14° 25' 42,474" N	81° 8' 6,961" W	22	3.1	0	0	0	15	0.5	0	0
2021-11-10	95	E	14° 26' 7,555" N	81° 8' 8,056" W	15.6	17.9	0	0.5	0.1	20	5	0	0.1
2021-11-11	96	B	14° 22' 58,692" N	81° 9' 20,855" W	9.8	6.4	0	0.3	0	60	0	0	0
2021-11-11	97	B	14° 25' 11,143" N	81° 10' 45,005" W	7.8	13.6	0.1	0	0	61.3	0	0	0
2021-11-11	98	G	14° 24' 22,604" N	81° 10' 56,248" W	12.6	22.2	2	2	0	15	0	0	0
2021-11-11	99	A	14° 29' 52,544" N	81° 7' 12,522" W	10.3	10.6	2	1	0	25	0	0	0
2021-11-11	100	B	14° 29' 43,076" N	81° 7' 19,031" W	8.2	6.5	0.5	2	0	40	0	0	0
2021-11-11	101	B	14° 29' 31,585" N	81° 7' 29,046" W	4.9	5.1	0	1	0	53.9	0	0	0
2021-11-11	102	B	14° 29' 19,010" N	81° 7' 44,918" W	4.3	9	0.1	2	0	38.9	0	0	0
2021-11-11	103	B	14° 28' 46,772" N	81° 7' 43,532" W	2.7	0.7	0	0	0	20	0	0	0
2021-11-11	104	J	14° 28' 54,217" N	81° 7' 24,762" W	8.5	53.7	0	1.5	0	5	0	0	0
2021-11-11	105	E	14° 27' 21,211" N	81° 9' 42,541" W	2.6	26.3	0	0	0	38.7	0	3	2
2021-11-11	106	B	14° 26' 30,952" N	81° 11' 31,672" W	8.5	4.7	1	0.5	0	20	0	0	0
2021-11-11	107	J	14° 14' 37.007" N	81° 11' 46.806" W	0	59.5	0	0	2	0	0	0	5
2021-11-11	108	A	14° 25' 43,590" N	81° 10' 55,693" W	16.4	17.4	6	4	0	60	5	3	0
2021-11-12	109	B	14° 23' 7,253" N	81° 9' 25,074" W	9	9.2	1	3	0.1	64.7	0	0	2
2021-11-12	110	B	14° 16' 48,598" N	81° 11' 46,212" W	8.2	5.7	0.5	1	0	40	0	0	0
2021-11-12	111	G	14° 16' 47,176" N	81° 11' 10,568" W	6	12.9	3	6	0	13.1	0	0	10
2021-11-12	112	B	14° 13' 45,239" N	81° 11' 35,401" W	6.7	10.3	1	1	0	39.7	0	0	0
2021-11-12	113	B	14° 16' 50,671" N	81° 10' 40,217" W	7.7	7	1.5	2	0	39.5	0	0	0
2021-11-12	114	G	14° 14' 39,512" N	81° 11' 42,061" W	3.9	4.91	5	2	0	3.09	0	0	0
2021-11-12	115	D	14° 14' 45,427" N	81° 11' 50,071" W	2.4	9.6	8	10	0	37.4	0	5	20
2021-11-12	116	B	14° 14' 38,231" N	81° 12' 15,242" W	8.5	11.3	0.5	1	0	50	0	0	0
2021-11-12	117	B	14° 15' 7,474" N	81° 13' 3,907" W	5	12.81	0	2	0	40	0	0	1
2021-11-12	118	D	14° 14' 36,413" N	81° 13' 21,479" W	5	11	0	0	0	30	0	5	15
2021-11-12	119	B	14° 14' 56,227" N	81° 12' 19,480" W	2.3	0.9	0.1	0	0	70	0	0	0
2021-11-12	120	J	14° 21' 24,746" N	81° 8' 32,14" W	2.5	46	0	1	0	3	0	0	0
