# Supplementary material for: Coral reef degradation at an atoll of the Western Colombian Caribbean
Source: PeerJ journal article supplement (doi:10.7717/peerj.15057), 2023-04-12
Supplement: Table_S1.pdf [file Table_S1.pdf]

**Table S1.** Summary of SIMPER for Quitasueño benthic community. Average abundance (% cover transformed to root arcsine) of typifying benthic organisms in each group formed by the CLUSTER analysis over the cover of the benthic community considered, their contribution (%) to the within-group similarity, and the cumulative total (%) of contributions (90% cut-off). Hard corals (C; Scleractinia and Milleporidae), fleshy macroalgae (MALG), calcareous macroalgae (CALG), encrusting algae (EALG), octocorals (OCTO) and sponges (SPG).

**GROUP A**

*Average similarity: 87,52*

|      | Average abundance | Av.Diss | Diss/SD | Contrib% | Cum.% |
|------|-------------------|---------|---------|----------|-------|
| MALG | 1,57              | 49,78   | 14,65   | 56,88    | 56,88 |
| C    | 0,8               | 21,07   | 3,18    | 24,08    | 80,96 |
| ESP  | 0,29              | 7,57    | 4,42    | 8,65     | 89,61 |
| OCTO | 0,34              | 7,36    | 1,75    | 8,41     | 98,02 |

**GROUP B**

*Average similarity: 87,66*

|      |      |       |      |       |       |
|------|------|-------|------|-------|-------|
| MALG | 1,57 | 68,97 | 9,06 | 78,68 | 78,68 |
| C    | 0,39 | 12,64 | 2,05 | 14,42 | 93,1  |

**GROUP C**

*Average similarity: 86,33*

|      |      |       |   |       |       |
|------|------|-------|---|-------|-------|
| MALG | 1,57 | 48,2  | - | 55,83 | 55,83 |
| ESP  | 0,71 | 19,42 | - | 22,5  | 78,33 |
| C    | 0,51 | 13,84 | - | 16,03 | 94,36 |

**GROUP D**

*Average similarity: 84,96*

|      |      |       |      |       |       |
|------|------|-------|------|-------|-------|
| MALG | 1,57 | 47,02 | 9,13 | 55,34 | 55,34 |
| EALG | 0,66 | 16,81 | 4,73 | 19,78 | 75,12 |
| C    | 0,68 | 16,37 | 4,94 | 19,26 | 94,39 |

**GROUP E**

*Average similarity: 82,67*

|      |      |       |       |       |       |
|------|------|-------|-------|-------|-------|
| MALG | 1,57 | 46,86 | 23,87 | 56,68 | 56,68 |
| C    | 1,22 | 33,08 | 7,31  | 40,02 | 96,7  |

**GROUP F**

*Average similarity: 75,94*

|      |      |       |   |       |       |
|------|------|-------|---|-------|-------|
| MALG | 1,57 | 40,14 | - | 52,86 | 52,86 |
| CALG | 0,88 | 20,07 | - | 26,43 | 79,29 |
| C    | 0,47 | 5,91  | - | 7,78  | 87,07 |
| ESP  | 0,56 | 5,76  | - | 7,59  | 94,66 |

**GROUP G**

*Average similarity: 74,51*

|   |      |       |      |       |       |
|---|------|-------|------|-------|-------|
| C | 1,47 | 31,41 | 5,03 | 42,16 | 42,16 |
|---|------|-------|------|-------|-------|

|                                  |      |       |       |       |       |
|----------------------------------|------|-------|-------|-------|-------|
| MALG                             | 1,22 | 23,76 | 5,07  | 31,88 | 74,04 |
| OCTO                             | 0,57 | 8,76  | 2,94  | 11,76 | 85,8  |
| ESP                              | 0,44 | 4,74  | 0,83  | 6,36  | 92,16 |
| <b>GROUP J</b>                   |      |       |       |       |       |
| <i>Average similarity: 73,24</i> |      |       |       |       |       |
| C                                | 1,57 | 61,8  | 5,28  | 84,38 | 84,38 |
| MALG                             | 0,31 | 4,38  | 0,77  | 5,98  | 90,36 |
| <b>GROUP K</b>                   |      |       |       |       |       |
| <i>Average similarity: 78,73</i> |      |       |       |       |       |
| EALG                             | 1,57 | 39,03 | 10,57 | 49,57 | 49,57 |
| MALG                             | 0,91 | 20,61 | 12,1  | 26,17 | 75,75 |
| C                                | 0,68 | 14,39 | 4,83  | 18,27 | 94,02 |
